# Supplementary material for: The most abundant cyst wall proteins of Acanthamoeba castellanii are lectins that bind cellulose and localize to distinct structures in developing and mature cyst walls
Source: PLOS journal article supplement (doi:10.1371/journal.pntd.0007352), 2019-05-16

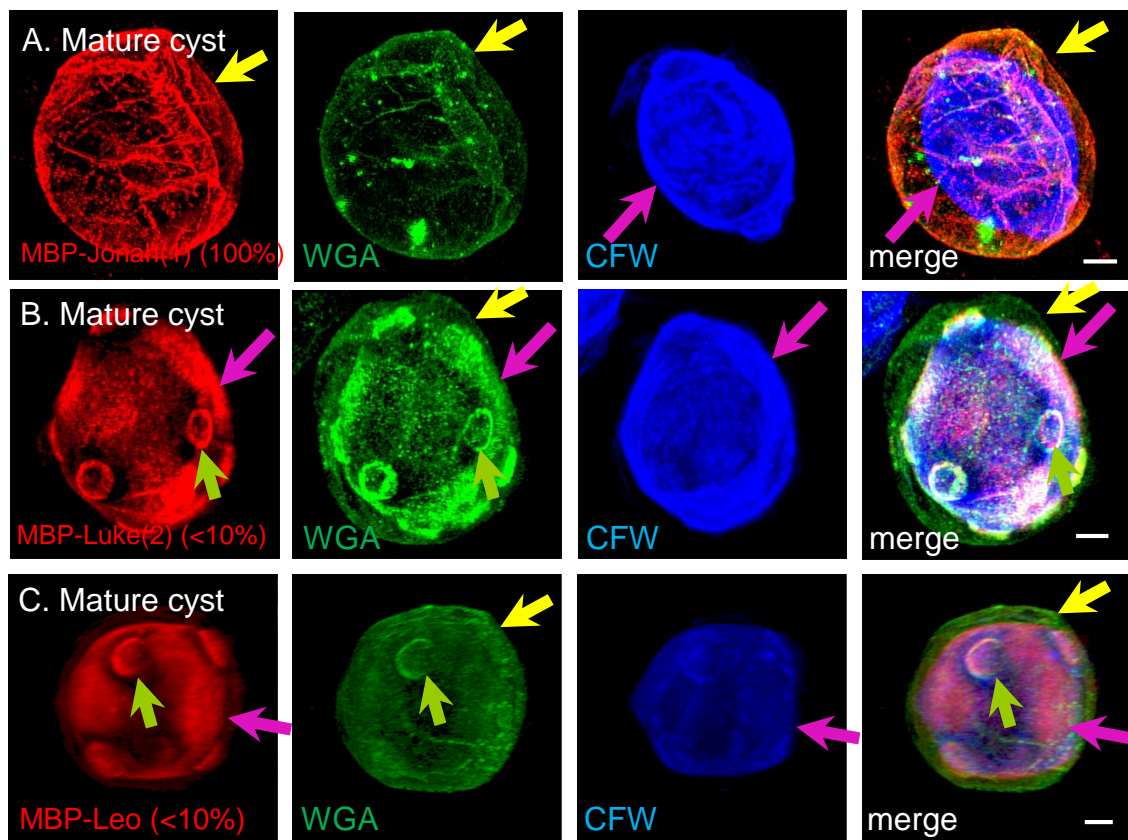

Supplement: S7 (10.1371/journal.pntd.0007352.s007) [file journal.pntd.0007352.s007]
